# Supplementary material
Source: HighWire-hosted journal article supplement (https://svn.smart01.highwire.org/content/svn-2019-000233)
Supplement: inline-supplementary-material-1 [file inline-supplementary-material-1.pdf]

## **Supplemental materials**

### **Five major targets in the health-care reform plan in China in 2009**

1. Medical insurance: expand basic medical insurance programs to cover more than 90% of Chinese people.
2. Drug supply security: Establish a national system for essential drugs to meet the basic need for treatment and prevention of diseases and to ensure safety, quality, and supply.
3. Medical service provision: Develop a primary healthcare service to improve the medical care and public health service system at grassroots level.
4. Public health service: Provide equal access to urban and rural dwellers.
5. Reform in public hospitals to increase in public investment, restructure the hospital management system, and correct the tendency for commercialisation.

## **Major categories of data and Key variables**

### **A. Demographic:**

Gender, Age, Ethnicity, Education Level, Medical Insurance, Occupation, Others

### **B. Medical History:**

Diabetes Mellitus, Hypertension, Dyslipidemia, Stroke History, Heart Disease History (Coronary Atherosclerotic Heart Disease, Heart Failure, Atrial Fibrillation, others), Others

### **C. Medications History:**

Antiplatelet Agents, Anticoagulant Agents, Lipid-modifying Agents, Hypoglycemic Agents, Antihypertensive Agents, Others

### **D. In-hospital Examination**

Blood test: Total Cholesterol (CHO), Triglyceride(TG), High Density Lipoprotein(HDL), Low Density Lipoprotein(LDL), Fasting Plasma Glucose(FPG), Hemoglobin A1c, Homocysteine (HCY), Serum Creatinine, Serum Urea Nitrogen, INR, Uric Acid, White Blood Cell, Platelet, High-sensitivity C-reactive Protein, C-reactive Protein, Others

### **E. Imaging Evaluation**

Head CT, Head MRI, TCD (Transcranial Doppler, CTA ( CT Angiography, MRA ( Magnetic Resonance Angiography ) , DSA ( Digital Subtraction Angiography ) , Transthoracic Echocardiography, Transesophageal Echocardiography, 24-hour Dynamic Blood Pressure Monitoring, 24-hour Dynamic Electrocardiogram, TCD Foaming Test, Others

### **F. In-hospital Interventions and Complications**

IV Thrombolytic Therapy, Antiplatelet / Antithrombotic Therapy, Anticoagulant Therapy, Lipid- modifying Therapy, Antihyperglycemic Therapy, Antihypertensive Therapy, Administered Traditional Chinese Drugs, Others

Administered Vascular Related Procedures and Surgical Treatment (Carotid Artery Stenting/ Carotid Endarterectomy (CEA)/ Intracranial Artery Stenting/ Decompressive

Hemicraniectomy), Administered Carotid Artery Stenting, Administered Carotid Endarterectomy (CEA), Administered Intracranial Artery Stenting, Administered Decompressive Hemicraniectomy, Others

Swallow function assessment, DVT Prophylaxis, Rehabilitation Evaluation, Others

## **G. In-hospital Complications**

Neurological Complications, Other Complications: Pulmonary Embolism, Atrial Fibrillation, Urinary Tract Infections, Cardiac and/or Pulmonary Arrest, Myocardial Infarction, Pneumonia, Others

## **H. Discharge Information**

Status at discharge (Death, Survival), Discharge Date, The Length of Stay, Hospital Expenditure (RBM), Medicine Expenditure (RBM), Discharge Way, Discharge Destination, Others

Discharge Medication: Antiplatelet Agents, Anticoagulant Therapy, Lipid- modifying Therapy, Antihyperglycemic Therapy, Antihyperglycemic Therapy, Stroke Education or Lifestyle Interventions, Others

Others
